# Supplementary material
Source: HighWire-hosted journal article supplement (https://www.annfammed.org/highwire/filestream/7680/field_highwire_adjunct_files/0/Pace_Suppl_Fig_1.pdf)
Supplement: Pace_Suppl_Fig_1.pdf [file Pace_Suppl_Fig_1.pdf]

Pace WD, Dickinson LM, Staton EW. Seasonal variation in diagnoses and visits to family physicians. *Ann Fam Med.* 2004;2:411-417.

<http://www.annfammed.org/cgi/content/full/2/5/411/DC1>

**Figure 1. Percentage of diagnoses.**

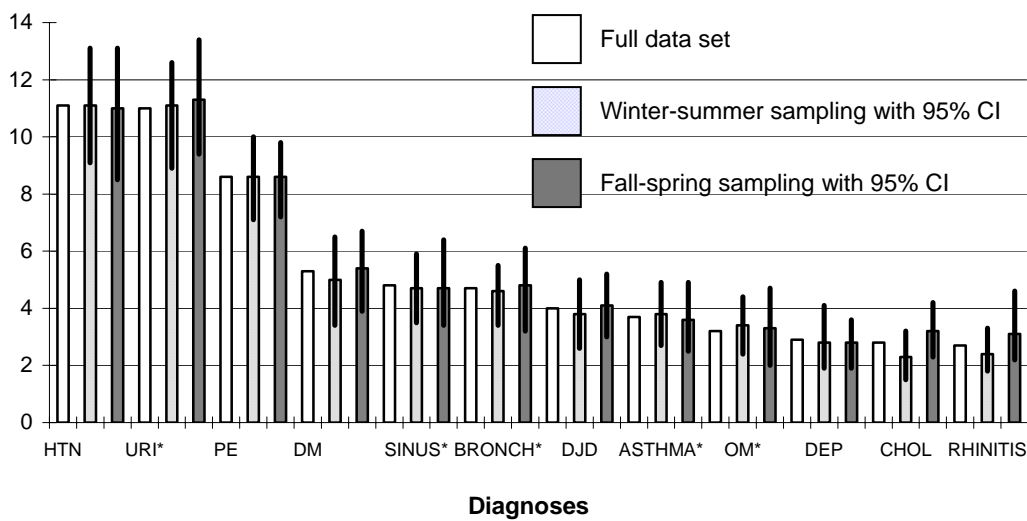

CI = confidence interval; HTN = hypertension, URI = upper respiratory tract infection, PE = physical examination, DM = diabetes mellitus, SINUS = sinusitis, BRONCH = bronchitis, DJD = degenerative joint disease, OM = otitis media, DEP = depression, CHOL = hypercholesterolemia.

\* Robust seasonality.
